# Supplementary material for: Rapid Typing of Coxiella burnetii
Source: PLoS One. 2011 Nov 2;6(11):e26201. doi: 10.1371/journal.pone.0026201 (PMC3206805; doi:10.1371/journal.pone.0026201)
Supplement: Table S1 — Phylogenetic characterization of the 112 polymorphisms from MST sequence comparisons. aLocus name is given as the MST locus followed by the base position in the alignment (Fig. S1). bBranch indicates the phylogenetic location(s) of each polymorphism on the phylogenetic tree (Fig. S2). cLocus type describes the nature of the polymorphism: bi-allelic SNP, tri-allelic SNP or indel; autapomorphies are also indicated. dThis locus was not homoplastic based on in silico analyses but was found to be homoplastic for a single sample when assayed against the entire panel of DNA (see text). eAssays presented in this work. (XLS) [file pone.0026201.s003.xls]

## Sheet: Table S1
Table S1. Phylogenetic characterization of the 112 polymorphisms from MST sequence comparisons.
Locus namea	Branchb	Locus typec	Homoplastic?
Cox2bp31	Br.IV.016	bi-allelic; autapomorphic ST9	no
Cox2bp60	Br.II.009	bi-allelic	no
Cox2bp77	Br.IV.013	bi-allelic; autapomorphic ST31	no
Cox2bp104	Br.II.014	bi-allelic	no
Cox2bp120	Br.V.001	bi-allelic; autapomorphic ST21	no
Cox2bp173	Br.I/II/III	bi-allelic	no
Cox2bp237	Br.IV.007	bi-allelic	no
Cox2bp258	Br.IV.011; Br.IV.014	bi-allelic	yes
Cox2bp325	Br.IV.007; Br.VI.001	indel	no
Cox5bp81e	Br.V.001	bi-allelic; autapomorphic ST21	no
Cox5bp98	Br.III.002	bi-allelic; autapomorphic for ST19	no
Cox5bp109e	Br.III.001	bi-allelic	no
Cox5bp133	Br.I/II/III; Br.IV.009; Br.IV.011	indel	no
Cox5bp210	Br.VI.001	bi-allelic; autapomorphic STDugway	no
Cox5bp211	Br.VI.001	bi-allelic; autapomorphic STDugway	no
Cox5bp263	Br.V.001	indel; autapomorphic ST21	no
Cox5bp270	Br.II.007	bi-allelic	no
Cox5bp308	Br.V.001	bi-allelic; autapomorphic ST21	no
Cox5bp341	Br.III.001	bi-allelic	no
Cox18bp31	Br.I/II/III	bi-allelic	no
Cox18bp34e	Br.IV.001	bi-allelic	no
Cox18bp68	Br.III.002	bi-allelic; autapomorphic for ST19	no
Cox18bp70	Br.II.001	bi-allelic	no
Cox18bp76	Br.VI.001	bi-allelic; autapomorphic STDugway	no
Cox18bp129	Br.IV.002	indel	no
Cox18bp166d,e	Br.II.001	bi-allelic	nod
Cox18bp191	Br.VI.001	bi-allelic; autapomorphic STDugway	no
Cox18bp242	Br.IV.010	bi-allelic; autapomorphic ST30	no
Cox18bp269	Br.IV.012	bi-allelic	no
Cox18bp304	Br.V.001	bi-allelic; autapomorphic ST21	no
Cox18bp358	Br.IV.012	bi-allelic	no
Cox18bp376e	Br.I.001	bi-allelic	no
Cox18bp449	Br.IV.014	bi-allelic	no
Cox20bp110	Br.IV.004	bi-allelic; autapomorphic ST4	no
Cox20bp112	Br.III.003; Br.IV.015	bi-allelic	yes
Cox20bp155e	Br.VI.001	bi-allelic; autapomorphic STDugway	no
Cox20bp216	Br.III.002	bi-allelic; autapomorphic for ST19	no
Cox20bp264	Br.I.002	bi-allelic; autapomorphic for ST17	no
Cox20bp286	Br.I.003	bi-allelic	no
Cox20bp484	Br.IV.001; Br.VI.001	indel	no
Cox20bp555	Br.IV.005; Br.VI.001.Dugway	indel	yes
Cox22bp91e	Br.I/II/III	bi-allelic	no
Cox22bp118e	Br.IV.011	bi-allelic	no
Cox22bp138	Br.IV/VI	bi-allelic	no
Cox22bp139	Br.V.001	bi-allelic; autapomorphic ST21	no
Cox22bp162	Br.I.001	bi-allelic	no
Cox22bp169	Br.II.002	bi-allelic	no
Cox22bp208	Br.V.001	bi-allelic; autapomorphic ST21	no
Cox22bp300	Br.IV.011; Br.IV.013; Br.IV.014	bi-allelic	yes
Cox22bp307	Br.IV.014	indel	no
Cox37bp33	Br.II.016; Br.IV.006	tri-allelic	no
Cox37bp45	Br.II.016; Br.IV.001	bi-allelic	yes
Cox37bp100	Br.I.001	bi-allelic	no
Cox37bp127	Br.IV.008	bi-allelic; autapomorphic ST5	no
Cox37bp191	Br.II.015	bi-allelic; autapomorphic for ST33	no
Cox37bp215e	Br.II.004	bi-allelic	no
Cox37bp239	Br.V.001	bi-allelic; autapomorphic ST21	no
Cox37bp352	Br.II.016; Br.IV.001	indel	yes
Cox51bp67e	Br.IV.015	bi-allelic; autapomorphic ST8	no
Cox51bp70	Br.IV.011	bi-allelic	no
Cox51bp75	Br.V.001	bi-allelic; autapomorphic ST21	no
Cox51bp106	Br.III.003	indel; autapomorphic for ST20	no
Cox51bp187	Br.V.001	indel; autapomorphic ST21	no
Cox51bp203	Br.VI.001	bi-allelic; autapomorphic STDugway	no
Cox51bp209	Br.VI.001	bi-allelic; autapomorphic STDugway	no
Cox51bp276	Br.I/II/III; Br.II.007; Br.III.002	indel	no
Cox51bp356e	Br.I.003	bi-allelic	no
Cox51bp404	Br.II.014	bi-allelic	no
Cox51bp492e	Br.II.007	bi-allelic	no
Cox51bp590	Br.II.002	bi-allelic	no
Cox56bp10e	Br.III.003	bi-allelic; autapomorphic for ST20	no
Cox56bp36	Br.I/II/III; Br.II.006	indel	yes
Cox56bp63	Br.IV.010	indel; autapomorphic ST30	no
Cox56bp74	Br.II.007; Br.IV.017	bi-allelic	yes
Cox56bp97	Br.II.007; Br.IV.017	bi-allelic	yes
Cox56bp152	Br.II.008	indel; autapomorphic for ST13	no
Cox56bp166	Br.IV.010	indel; autapomorphic ST30	no
Cox56bp167	Br.IV.010; Br.V.001	bi-allelic	yes
Cox56bp229	Br.V.001	bi-allelic; autapomorphic ST21	no
Cox56bp264	Br.V.001	bi-allelic; autapomorphic ST21	no
Cox56bp306	Br.I/II/III; Br.II.006; Br.II.011; Br.III.003; Br.IV.003; Br.IV.011; Br.V.001; Br.VI.001	indel	yes
Cox56bp331	Br.I.002	bi-allelic; autapomorphic for ST17	no
Cox56bp345	Br.I/II/III; Br.II.006; Br.II.013; Br.III.003	bi-allelic	yes
Cox56bp351	Br.I.002	bi-allelic; autapomorphic for ST17	no
Cox57bp1	Br.I.004; Br.II.010	indel	no
Cox57bp58	Br.V.001	bi-allelic; autapomorphic ST21	no
Cox57bp73	Br.IV.017	bi-allelic; autapomorphic ST10	no
Cox57bp97	Br.IV/VI	bi-allelic	no
Cox57bp192	Br.IV.010	bi-allelic; autapomorphic ST30	no
Cox57bp208	Br.IV.011	bi-allelic	no
Cox57bp212	Br.IV.001	bi-allelic	no
Cox57bp214	Br.V.001	bi-allelic; autapomorphic ST21	no
Cox57bp223	Br.II.007; Br.V.001	tri-allelic	no
Cox57bp228	Br.V.001	bi-allelic; autapomorphic ST21	no
Cox57bp229	Br.II.003	indel; autapomorphic for ST25	no
Cox57bp327e	Br.IV/VI	bi-allelic	no
Cox57bp396	Br.V.001	indel; autapomorphic ST21	no
Cox57bp587	Br.I.004; Br.II.010	indel	no
Cox61bp24	Br.II.005	bi-allelic; autapomorphic for ST22	no
Cox61bp29	Br.V.001	bi-allelic; autapomorphic ST21	no
Cox61bp36	Br.V.001	bi-allelic; autapomorphic ST21	no
Cox61bp92	Br.II.007	bi-allelic	no
Cox61bp100	Br.I/II/III; Br.II.012	tri-allelic	no
Cox61bp118	Br.V.001	indel; autapomorphic ST21	no
Cox61bp176	Br.II.007	bi-allelic	no
Cox61bp206	Br.I/II/III	bi-allelic	no
Cox61bp226	Br.I/II/III	bi-allelic	no
Cox61bp368	Br.II.002	bi-allelic	no
Cox61bp427	Br.IV/VI	bi-allelic	no
Cox61bp451	Br.IV.015	bi-allelic; autapomorphic ST8	no
Cox61bp459	Br.IV.001	bi-allelic	no
Cox61bp557	Br.I.002	bi-allelic; autapomorphic for ST17	no
aLocus name is given as the MST locus followed by the base position in the alignment (Fig. S1).
bBranch indicates the phylogenetic location(s) of each polymorphism on the phylogenetic tree (Fig. S2).
cLocus type describes the nature of the polymorphism: bi-allelic SNP, tri-allelic SNP or indel; autapomorphies are also indicated.
dThis locus was not homplastic based on in silico analyses but was found to be homoplastic for a single sample when assayed against the entire panel of DNA (see text).
eAssays presented in this work.
