# Supplementary material for: Rapid Typing of Coxiella burnetii
Source: PLoS One. 2011 Nov 2;6(11):e26201. doi: 10.1371/journal.pone.0026201 (PMC3206805; doi:10.1371/journal.pone.0026201)
Supplement: Table S2 — Epidemiological and results data for samples used in this study. aExpected MST genotype based on overlap of samples with Glazunova et al. [7] (denoted with b) or from in silico analysis of whole genome sequences from this work (denoted with c). Samples with a listing of n/a were not reported in Glazunova et al. [7] (based on a comparison of sample name alone) nor had whole genome sequence available for in silico analysis. Thus we could not predict the genotype based on other studies. dObserved MST genotype(s) based on the results from 14 SNP assays presented here. eVaccine strain. fSample contained mixed genotypes as determined by both alleles amplifying at four loci. gAllele determined to be homoplastic based on allele calls at the 13 other loci. Abbreviations and symbols: WGS, Whole genome sequences where sequences and epidemiological data were used from http://www.ncbi.nlm.nih.gov and SNP data was derived using in silico techniques; EP, egg passage; -, epidemiological data is missing or unknown; ?, alleles were absent when genotyped using in silico methods; u, data was undetermined; nt, assay was not tested. (XLSX) [file pone.0026201.s004.xlsx]

## Sheet: Table S2
Table S2. Epidemiological and results data for samples used in this study.
Isolate	Other names	Original source	Location	Year	Locus Cox5bp81	Locus Cox22bp91	Locus Cox18bp376	Locus Cox51bp356	Locus Cox18bp34	Locus Cox5bp109	Locus Cox22bp118	Locus Cox51bp492	Locus Cox57bp327	Locus Cox56bp10	Locus Cox37bp215	Locus Cox51bp67	Locus Cox20bp155	Locus Cox18bp166	Expected MST genotypea	Observed MST genotype(s)d	Genomic group from Hendrix et al. [10]	Predicted genomic group (this study)
AD California	-	-	California, USA	-	G	T	A	T	T	T	C	G	G	T	G	T	G	G	n/a	16, 26	n/a	I
African Q	RSA 334	Human blood	Central Africa	1949	G	T	A	T	T	T	C	G	G	T	G	T	G	G	2c	16, 26	I	I
Australian QD	RSA 425	Human blood	Australia	1939	G	T	A	T	T	T	C	G	G	T	G	T	G	G	n/a	16, 26	I	I
B1	-	Goat	Cyprus	-	G	T	A	T	T	T	C	G	G	T	G	T	G	G	n/a	16, 26	n/a	I
C193	-	-	-	-	G	T	A	T	T	T	C	G	G	T	G	T	G	G	n/a	16, 26	n/a	I
California 33	RSA 329	Cow milk	California, USA	1947	G	T	A	T	T	T	C	G	G	T	G	T	G	G	16b	16, 26	I	I
Cypriot	-	-	-	-	G	T	A	T	T	T	C	G	G	T	G	T	G	G	n/a	16, 26	n/a	I
Dugway 5G 61-63	-	Dermacentor parumaperlus (Tick)	Utah, USA	1958	G	T	A	T	T	T	C	G	G	T	G	T	G	G	n/a	16, 26	n/a	I
Dyer	-	Human blood	Montana, USA	1938	G	T	A	T	T	T	C	G	G	T	G	T	G	G	16b	16, 26	I	I
ES-VA1	-	Environmental	Virginia, USA	2010	G	T	A	T	T	T	C	G	G	T	G	T	G	G	n/a	16, 26	n/a	I
Giroud Bangui	RSA 431	Human blood	Central Africa	1949	G	T	A	T	T	T	C	G	G	T	G	T	G	G	16b	16, 26	I	I
Idaho JA	-	-	Idaho, USA	-	G	T	A	T	T	T	C	G	G	T	G	T	G	G	n/a	16, 26	n/a	I
Idaho Q	-	-	Idaho, USA	1975	G	T	A	T	T	T	C	G	G	T	G	T	G	G	n/a	16, 26	n/a	I
L 35	CS L 35	Human blood	Slovak Republic	1954	G	T	A	T	T	T	C	G	G	T	G	T	G	Cg	n/a	16, 26	n/a	I
Nine Mile phase I	RSA 493	Dermacentor andersoni (Tick)	Montana, USA	1935	G	T	A	T	T	T	C	G	G	T	G	T	G	G	16b,c	16, 26	I	I
Ohio 314	RSA 270	Cow milk	Ohio, USA	1958	G	T	A	T	T	T	C	G	G	T	G	T	G	G	16b	16, 26	I	I
Panama	RSA 335	Human acute	Panama	1945	nt	T	A	T	T	T	C	G	G	T	G	T	G	G	n/a	16, 26	I	I
Q155	-	-	-	-	G	T	A	T	T	T	C	G	G	T	G	T	G	G	n/a	16, 26	n/a	I
RSA 514	Crazy	Nine Mile phase I	-	-	G	T	A	T	T	T	C	G	G	T	G	T	G	G	16c	16, 26	I	I
Scottish	-	-	Scotland	-	G	T	A	T	T	T	C	G	G	T	G	T	G	G	n/a	16, 26	n/a	I
Turkey	-	Human blood	-	1948	G	T	A	T	T	T	C	G	G	T	G	T	G	G	n/a	16, 26	n/a	I
CB2	UR.CB.MIE1	Human blood	France	-	G	T	G	G	T	T	C	A	G	T	G	T	G	C	13b	11-15, 24, 32-34	n/a	II
Coyote Q	-	Coyote	USA	-	G	T	u	G	T	T	C	G	G	T	G	T	G	C/G	n/a	18, 25	n/a	II
Henzerling EP4	RSA 343	Human blood	Italy	1945	G	T	G	G	T	T	C	G	G	T	G	T	G	C	18c	18, 25	n/a	II
Henzerling Salke	Henzerling vaccine strain	Human blood	Italy	1945	G	T	G	G	T	T	C	G	G	T	G	T	G	C	18b,c	18, 25	n/a	II
M44	RSA 459, Grita	Human blood	Italy	1945	G	T	G	G	T	T	C	G	G	T	G	T	G	C	25b	18, 25	II	II
Paige	-	Human acute	Italy	1946	G	T	G	G	T	T	C	G	G	T	G	T	G	C	n/a	18, 25	n/a	II
Qi-Yi	-	Human bone marrow	China	1962	G	T	G	G	T	T	C	G	G	T	G	T	G	C	n/a	18, 25	n/a	II
Xingiao	-	Haemophysalis campanulata (Tick)	China	-	G	T	G	G	T	T	C	G	G	T	G	T	G	C	n/a	18, 25	n/a	II
27	CS 27	Dermacentor marginatus (Tick)	Slovak Republic	1968	G	T	G	G	T	T	C	G	G	T	A	T	G	C	23b	22, 23, 29	n/a	II
48	CS 48	Haemophysalis punctata (Tick)	Slovak Republic	1967	G	T	G	G	T	T	C	G	G	T	A	T	G	C	22b	22, 23, 29	n/a	II
CS L	-	Dermacentor marginatus (Tick)	Slovak Republic	1968	G	T	G	G	T	T	C	G	G	T	A	T	G	C	n/a	22, 23, 29	n/a	II
Florian	-	Human blood	Slovak Republic	1956	G	T	G	G	T	T	C	G	G	T	A	T	G	C	18b	22, 23, 29	n/a	II
S1	CS S1	Cow	Russia	-	G	T	G	G	T	T	C	G	G	T	A	T	G	C	n/a	22, 23, 29	n/a	II
CM-CA1	-	Cow milk	California, USA	2007	G	T	G	G	T	C	C	G	G	C	G	T	G	G	n/a	20	n/a	III
CM-SC1	-	Cow milk	South Carolina, USA	2007	G	T	G	u	T	C	u	G	G	C	G	T	G	G	n/a	20	n/a	III
ES-FL1	-	Soil	Florida, USA	2010	G	T	G	G	T	C	C	G	G	C	G	T	G	G	n/a	20	n/a	III
Idaho goat	Q195	Goat placenta	Idaho, USA	1981	G	T	G	G	T	C	C	G	G	C	G	T	G	G	n/a	20	III	III
Canada Goat	Q218	Goat kid spleen, abortion	Ontario, Canada	1981	nt	C	G	G	C	T	A	G	A	T	G	T	G	G	n/a	8	IV	IV
ES-CA1	-	Environmental	California, USA	2011	G	C	G	G	C	T	A	G	A	T	G	C	G	G	n/a	8	n/a	IV
F	Q228	Human heart valve	Washinton, USA	1982	G	C	G	G	C	T	A	G	A	T	G	C	G	G	n/a	8	IV	IV
GP-CO1	-	Goat placenta, abortion	Colorado, USA	2007	G	C	G	G	C	T	A	G	A	T	G	C	G	G	n/a	8	n/a	IV
GP-CO2	-	Goat placenta, abortion	Colorado, USA	2007	G	C	G	G	C	T	A	G	A	T	G	C	G	G	n/a	8	n/a	IV
HHV-WA2	-	Human heart valve	Washinton, USA	2010	G	C	G	G	C	T	A	G	A	T	G	C	G	G	n/a	8	n/a	IV
K	Q154, KAV	Human heart valve	Oregon, USA	1979	G	C	G	G	C	T	A	G	A	T	G	C	G	G	8c	8	IV	IV
MSU Goat	Q177, Priscilla	Goat cotyledon, abortion	Montana, USA	1980	G	C	G	G	C	T	A	G	A	T	G	C	G	G	8b,c	8	n/a	IV
P	Q238, Q173, PAV	Human heart valve	California, USA	1979	G	C	G	G	C	T	A	G	A	T	G	C	G	G	n/a	8	IV	IV
Arandale	-	Human blood	Australia	-	G	C	G	G	C	u	C	G	A	T	G	T	G	G	n/a	1-7, 30	n/a	IV
CB1	UR.CB.MIE1	Human heart valve	France	1989	G	C	G	G	C	T	C	G	A	T	G	T	G	G	1b	1-7, 30	n/a	IV
HHV-WA1	-	Human heart valve	Washington, USA	2007	G	C	G	G	C	T	C	G	A	T	G	T	G	G	n/a	1-7, 30	n/a	IV
Deer Qf	E277	-	Colorado, USA	-	C/G	C/T	G/A	G/T	T	T	C	G	G	T	G	T	G	G	n/a	21; mixed with ST16, 26	n/a	IV and I
Arsenaula Dog Uterus	-	Canine uterus	-	-	C	C	G	G	T	T	C	G	G	T	G	T	G	G	n/a	21	n/a	V
G	Q212	Human heart valve	Nova Scotia	1981	C	C	G	G	T	T	C	G	G	T	G	T	G	G	21b,c	21	V	V
Ko	Q229	Human heart valve	Nova Scotia	1982	C	C	G	G	T	T	C	G	G	T	G	T	G	G	21b	21	V	V
L	Q216	Human heart valve	Nova Scotia	1981	C	C	G	G	T	T	C	G	G	T	G	T	G	G	n/a	21	V	V
McMaster	Q172	Human placenta	-	-	C	C	G	G	T	T	C	G	G	T	G	T	G	G	n/a	21	n/a	V
NSC-1	Nova Scotia cat	-	Nova Scotia	-	C	C	G	G	T	T	C	G	G	T	G	T	G	G	21b	21	n/a	V
Poker Cat	-	Cat uterus	Nova Scotia	1986	C	C	G	G	T	T	C	G	G	T	G	T	G	G	21b	21	n/a	V
S	Q217, Scurry	Human liver biopsy	Montana, USA	1981	C	C	G	G	T	T	C	G	G	T	G	T	G	G	21b	21	V	V
W	WAV	Human heart valve	-	-	C	C	G	G	T	T	C	G	G	T	G	T	G	G	n/a	21	n/a	V
Dugway 7D 77-80	-	Rodent	Utah	1957	G	C	G	G	T	T	C	G	A	T	G	T	A	G	n/a	Sequenced Dugway 5J108-111	n/a	VI
Dugway 7E 65-68	-	Rodent	Utah	1958	G	C	G	G	T	T	C	G	A	T	G	T	A	G	n/a	Sequenced Dugway 5J108-111	VI	VI
Dugway 7E 9-12	-	Rodent	Utah	-	G	C	G	G	T	T	C	G	A	T	G	T	A	G	n/a	Sequenced Dugway 5J108-111	VI	VI
RSA 493 (WGS)	Nine Mile phase I	-	-	-	G	T	A	T	T	T	C	G	G	T	G	T	G	G	16b	16, 26	n/a	I
RSA 331 (WGS)	Hentzerling	Human blood	Northern Italy	1945	G	T	G	G	T	T	C	G	G	T	G	T	G	C	18b	18, 25	II	II
CbuK Q154 (WGS)	-	Human heart valve	-	-	G	C	G	G	C	T	A	G	A	T	G	C	G	G	n/a	8	n/a	IV
MSU Goat Q177 (WGS)	-	-	-	-	G	C	G	G	C	T	A	G	A	?	G	C	G	G	8b	8	IV	IV
RSA 334 (WGS)	-	-	-	-	G	C	G	G	C	T	C	G	A	?	G	T	G	G	n/a	1-7, 30	n/a	IV
CbuG Q212 (WGS)	-	Human heart valve	-	-	C	C	G	G	T	T	C	G	G	T	G	T	G	G	21b	21	n/a	V
Dugway 5J108-111 (WGS)	-	Rodents	Utah, USA	-	G	C	G	G	T	T	C	G	A	T	G	T	A	G	20b	novel to sequenced Dugway 5J108-111	n/a	VI
aExpected MST genotype based on overlap of samples with Glazunova et al. [7] (denoted with b) or from in silico analysis of whole genome sequences from this work (denoted with c). Samples with a listing of n/a were not reported in Glazunova et al. [7] (based on a comparison of sample name alone) nor had whole genome sequence available for in silico analysis. Thus we could not predict the genotype…
dObserved MST genotype(s) based on the results from 14 SNP assays presented here.
eVaccine strain.
fSample contained mixed genotypes as determined by both alleles amplifying at four loci.
gAllele determined to be homoplastic based on allele calls at the 13 other loci.
Abbreviations and symbols: WGS, Whole genome sequences where sequences and epidemiological data were used from http://www.ncbi.nlm.nih.gov and SNP data was derived using in silico techniques; EP, egg passage; -, epidemiological data is missing or unknown; ?, alleles were absent when genotyped using in silico methods; u, data was undetermined; nt, assay was not tested.
